# Supplementary material
Source: publisher site journal article supplement (https://www.spandidos-publications.com/5367/downloadSupplementary)

Figure S1. Improvement in recovery. Considering the FMA-UE scores obtained by each patient as 100%, it was evaluated how each score evolved after 12 weeks of medical recovery. For each individual, the improvement of all domains of the FMA-UE: (A) upper extremity, (B) wrist, (C) hand and (D) coordination/speed and (E) total motor score of the two tested groups was similar ( $P>0.05$ ) was calculated after 12 weeks of functional recovery. FMA-UE, Fugl-Meyer Assessment Upper Extremity.

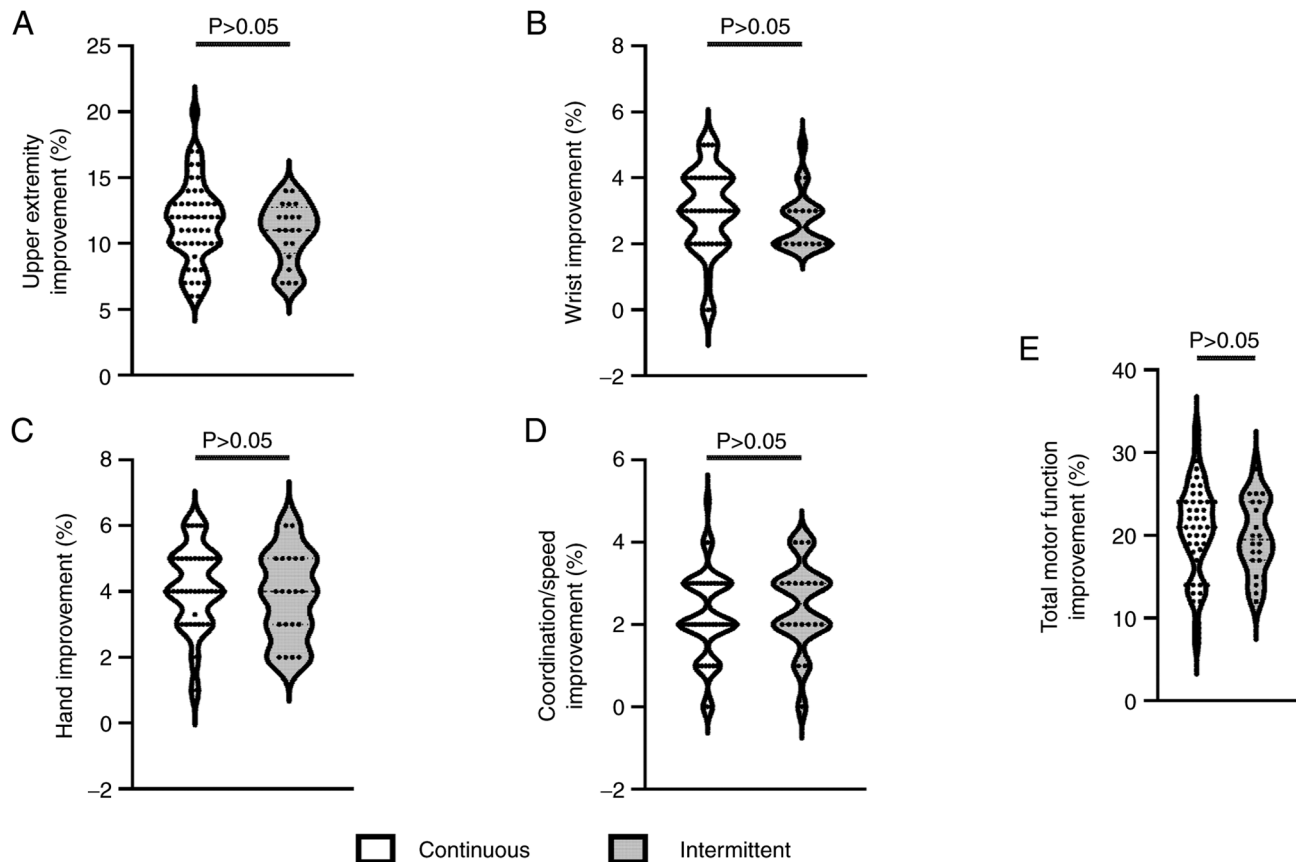

Supplement: Supplementary file 1 [file downloadSupplementary]
